# Supplementary material for: The α2A-adrenergic receptor (ADRA2A) modulates susceptibility to Raynaud’s syndrome
Source: bioRxiv or medRxiv preprint supplement (doi:10.1101/2023.10.04.23296526), 2023-10-12
Supplement: Supplementary file [file media-1.pdf]

## Supplementary file

### Table of Contents

|                                                                                                                                                     |   |
|-----------------------------------------------------------------------------------------------------------------------------------------------------|---|
| Supplementary Figures .....                                                                                                                         | 2 |
| Supplementary figure 1. Manhattan plots from all used cohorts .....                                                                                 | 2 |
| Supplementary figure 2. Manhattan plots UKB and FinnGen R10 – females and males .....                                                               | 3 |
| Supplementary figure 3. Co-localization plot for rs1343449 .....                                                                                    | 4 |
| Supplementary Tables .....                                                                                                                          | 4 |
| Supplementary table 1. Cohort demographics .....                                                                                                    | 4 |
| Supplementary table 2. Cohort specific lead variants .....                                                                                          | 5 |
| Supplementary table 3. Sample size meta-analysis UKB, FinnGen R10, the Estonian Biobank and the<br>Mass-General Brigham Biobank lead variants ..... | 6 |
| Supplementary table 4. Comparison of the lead variant in different cohorts.....                                                                     | 6 |
| Supplementary table 5. ENCODE stratified LD score regression .....                                                                                  | 7 |
| Supplementary table 6. GuideRNA sequences targeting rs7090046 in CRISPRi analysis .....                                                             | 7 |

## Supplementary Figures

Supplementary figure 1. Manhattan plots from all used cohorts

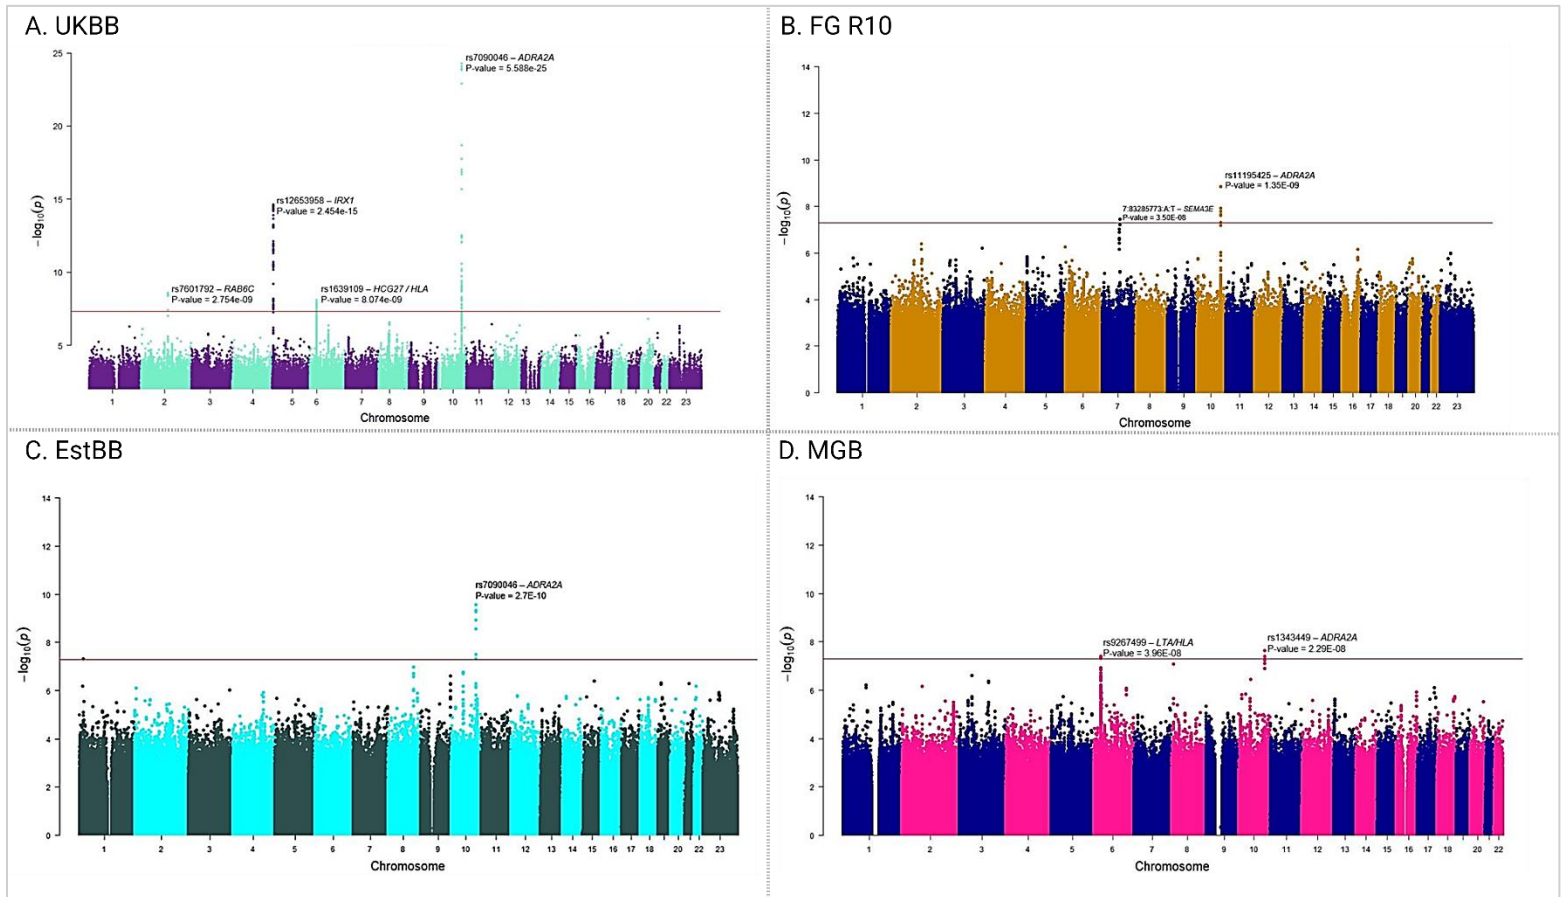

**Suppl.Fig.1.** Manhattan plots from GWA analyses A. UK Biobank, B. FinnGen data freeze 10, C. the Estonian Biobank, and D. the Mass-General Brigham Biobank.

Supplementary figure 2. Manhattan plots UKB and FinnGen R10 – females and males

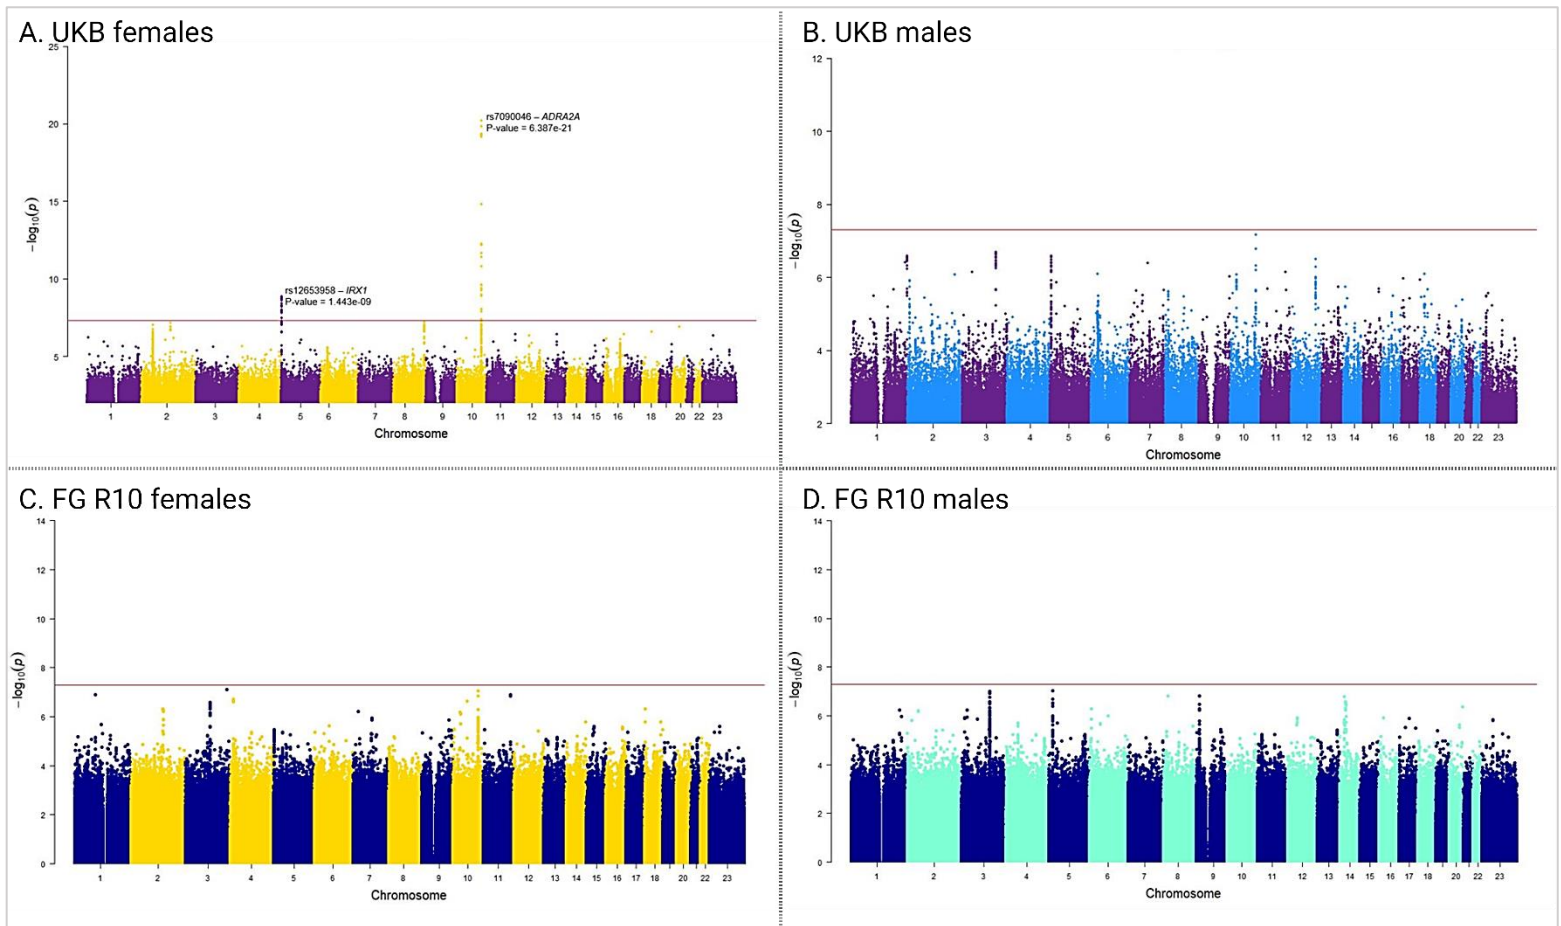

**Suppl.Fig.2.** Manhattan plots from sex-specific GWA analyses A. UK Biobank females, B. UK Biobank males, C. FinnGen data freeze 10 females, and D. FinnGen data freeze 10 males.

Supplementary figure 3. Co-localization plot for rs1343449

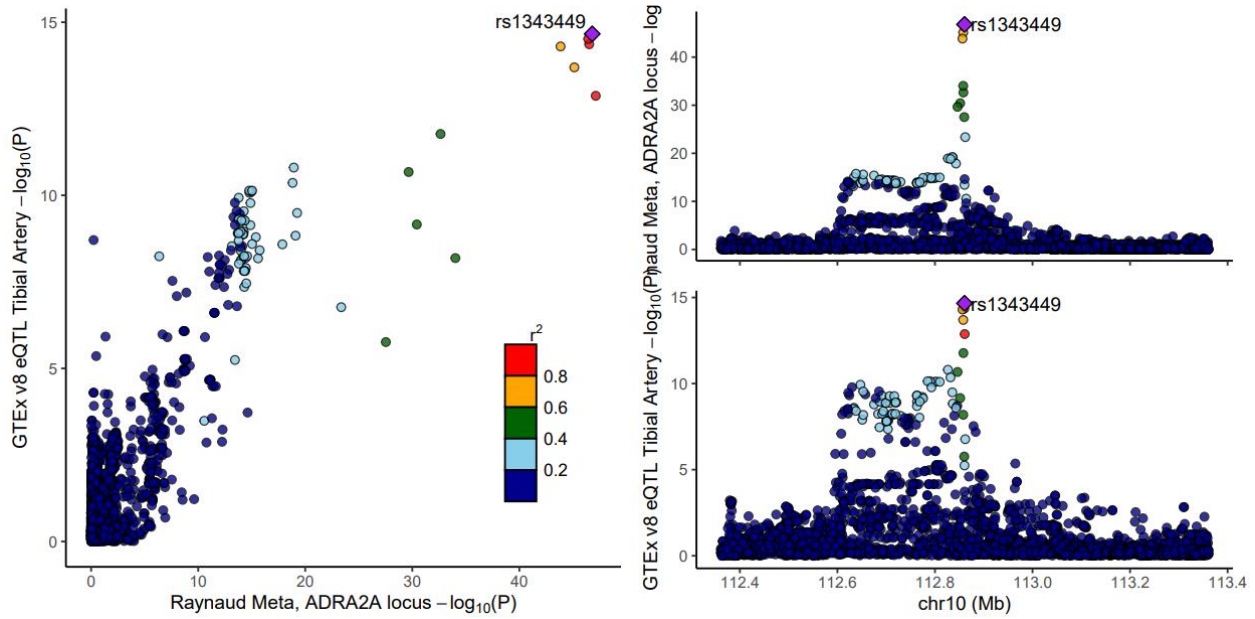

**Suppl. Fig. 3.** Raynaud's syndrome association colocalizes with the lead variant for *ADRA2A* expression in GTEx in tibial arteries (rs1343449).

## Supplementary Tables

Supplementary table 1. Cohort demographics

| Cohort               | RS cases | RS controls | Mean age of onset [SD] | Females in cases (%) |
|----------------------|----------|-------------|------------------------|----------------------|
| UKBB                 | 5,162    | 440,833     | 54.73 [14.13]          | 3,691 (71.5%)        |
| FinnGen R10          | 2,084    | 410,148     | 51.14 [16.20]          | 1,446 (69.4%)        |
| Estonia Biobank      | 2,205    | 203,345     | 43.03 [15.37]          | 1,672 (75.8%)        |
| Mass General Brigham | 1,907    | 52,545      | *NA                    | 1,507 (79.0%)        |
| Combined             | 11,358   | 1,106,871   | 49.63 [15.23]          | 8,510 (73.2%)        |

\*Information is not available for this cohort

Supplementary table 2. Cohort specific lead variants

**FinnGen R10 top 5 variants**

| SNP        | CHR | POS (b38) | Ref. | Alt. | Combined Alt.AF | P-value                | Beta  | SE    |
|------------|-----|-----------|------|------|-----------------|------------------------|-------|-------|
| rs11195425 | 10  | 111100270 | A    | T    | 0.129           | 1.35x10 <sup>-09</sup> | 0.266 | 0.044 |
| rs7090046  | 10  | 111101172 | G    | A    | 0.247           | 1.19x10 <sup>-08</sup> | 0.201 | 0.035 |
| rs1343451  | 10  | 111100633 | A    | G    | 0.247           | 1.58x10 <sup>-08</sup> | 0.199 | 0.035 |
| rs1343449  | 10  | 111100768 | A    | G    | 0.247           | 2.12x10 <sup>-08</sup> | 0.197 | 0.035 |
| rs7084501  | 10  | 111099941 | A    | G    | 0.248           | 2.50x10 <sup>-08</sup> | 0.196 | 0.035 |

**UKB top 5 variants**

| SNP       | CHR | POS (b37) | Ref. | Alt. | Combined Alt.AF | P-value                | Beta  | SE    |
|-----------|-----|-----------|------|------|-----------------|------------------------|-------|-------|
| rs7090046 | 10  | 112860930 | G    | A    | 0.310           | 5.59x10 <sup>-25</sup> | 0.217 | 0.021 |
| rs7084501 | 10  | 112859699 | A    | G    | 0.314           | 8.65x10 <sup>-25</sup> | 0.216 | 0.021 |
| rs1343449 | 10  | 112860526 | A    | G    | 0.316           | 1.27x10 <sup>-24</sup> | 0.214 | 0.021 |
| rs7075626 | 10  | 112857971 | G    | C    | 0.333           | 1.39x10 <sup>-24</sup> | 0.214 | 0.021 |
| rs1343451 | 10  | 112860391 | A    | G    | 0.314           | 1.50x10 <sup>-24</sup> | 0.214 | 0.021 |

**The EstBB top 5 variants**

| SNP       | CHR | POS (b37) | Ref. | Alt. | Combined Alt.AF | P-value                | Beta  | SE    |
|-----------|-----|-----------|------|------|-----------------|------------------------|-------|-------|
| rs7090046 | 10  | 112860930 | G    | A    | 0.234           | 2.68x10 <sup>-10</sup> | 0.227 | 0.036 |
| rs1343449 | 10  | 112860526 | A    | G    | 0.235           | 4.72x10 <sup>-10</sup> | 0.223 | 0.036 |
| rs7084501 | 10  | 112860391 | A    | G    | 0.239           | 4.95x10 <sup>-10</sup> | 0.222 | 0.036 |
| rs1343451 | 10  | 112859699 | A    | G    | 0.235           | 5.25x10 <sup>-10</sup> | 0.222 | 0.036 |
| rs7075626 | 10  | 112857971 | G    | C    | 0.269           | 1.17x10 <sup>-09</sup> | 0.209 | 0.034 |

**The Mass-General Brigham Biobank top 5 variants**

| SNP       | CHR | POS (b38) | Ref. | Alt. | Combined Alt.AF | P-value                | Beta   | SE    |
|-----------|-----|-----------|------|------|-----------------|------------------------|--------|-------|
| rs1343449 | 10  | 111100768 | A    | G    | 0.329           | 2.29x10 <sup>-08</sup> | 0.186  | 0.033 |
| rs9267499 | 6   | 31569519  | G    | C    | 0.105           | 3.96x10 <sup>-08</sup> | -0.297 | 0.056 |
| rs1343451 | 10  | 111100633 | A    | G    | 0.334           | 4.06x10 <sup>-08</sup> | 0.181  | 0.033 |
| rs4947324 | 6   | 31560353  | C    | T    | 0.105           | 4.82x10 <sup>-08</sup> | -0.295 | 0.056 |
| rs7084501 | 10  | 111099941 | A    | G    | 0.331           | 4.97x10 <sup>-08</sup> | 0.181  | 0.033 |

Supplementary table 3. Sample size meta-analysis UKB, FinnGen R10, the Estonian Biobank and the Mass-General Brigham Biobank lead variants

| SNP        | CHR | POS (b38) | Ref. | Alt. | P-value                | Heterogeneity P-value | Locus name         |
|------------|-----|-----------|------|------|------------------------|-----------------------|--------------------|
| rs7090046  | 10  | 111101172 | G    | A    | 4.08x10 <sup>-44</sup> | 0.001                 | <i>ADRA2A</i>      |
| rs56324263 | 5   | 4045532   | C    | T    | 8.21x10 <sup>-23</sup> | 0.028                 | <i>IRX1</i>        |
| rs3130968  | 6   | 31097294  | C    | T    | 8.11x10 <sup>-12</sup> | 0.244                 | <i>C6orf15/HLA</i> |
| rs743507   | 7   | 151010400 | C    | T    | 1.79x10 <sup>-09</sup> | 0.172                 | <i>NOS3</i>        |
| rs6988032  | 8   | 50580957  | G    | T    | 5.28x10 <sup>-08</sup> | 0.201                 | <i>SNTG1</i>       |

Supplementary table 4. Comparison of the lead variant in different cohorts

| SNP       | FinnGen R10                                              | UK Biobank                                               | The Estonian Biobank                                     | The Mass General Brigham Biobank                         | Meta-analysis                                            |
|-----------|----------------------------------------------------------|----------------------------------------------------------|----------------------------------------------------------|----------------------------------------------------------|----------------------------------------------------------|
| rs7090046 | P = 1.19x10 <sup>-08</sup><br>Beta = 0.201<br>SE = 0.035 | P = 5.59x10 <sup>-25</sup><br>Beta = 0.217<br>SE = 0.021 | P = 2.40x10 <sup>-11</sup><br>Beta = 0.260<br>SE = 0.038 | P = 5.84x10 <sup>-08</sup><br>Beta = 0.181<br>SE = 0.033 | P = 7.32x10 <sup>-48</sup><br>Beta = 0.213<br>SE = 0.015 |

Supplementary table 5. ENCODE stratified LD score regression

| Name                                                     | Coefficient             | Coefficient_std_error   | Coefficient_P_value     |
|----------------------------------------------------------|-------------------------|-------------------------|-------------------------|
| Stomach_Smooth_Muscle__H3K4me1                           | 8.40 x10 <sup>-09</sup> | 2.77 x10 <sup>-09</sup> | 1.20 x10 <sup>-03</sup> |
| Stomach_Smooth_Muscle__H3K27ac                           | 6.04 x10 <sup>-09</sup> | 2.11 x10 <sup>-09</sup> | 2.12 x10 <sup>-03</sup> |
| Rectal_Smooth_Muscle__H3K4me1                            | 6.99 x10 <sup>-09</sup> | 2.51 x10 <sup>-09</sup> | 2.70 x10 <sup>-03</sup> |
| Duodenum_Smooth_Muscle__H3K4me1                          | 8.65 x10 <sup>-09</sup> | 3.16 x10 <sup>-09</sup> | 3.08 x10 <sup>-03</sup> |
| Fetal_Stomach__H3K4me1                                   | 7.27 x10 <sup>-09</sup> | 2.66 x10 <sup>-09</sup> | 3.09 x10 <sup>-03</sup> |
| Esoph-Mucosa_ENTEX__H3K4me1                              | 4.76 x10 <sup>-09</sup> | 1.89 x10 <sup>-09</sup> | 5.94 x10 <sup>-03</sup> |
| Artery-Coronary_ENTEX__H3K27ac                           | 5.51 x10 <sup>-09</sup> | 2.31 x10 <sup>-09</sup> | 8.46 x10 <sup>-03</sup> |
| Stomach_Smooth_Muscle__H3K4me3                           | 1.21 x10 <sup>-08</sup> | 5.15 x10 <sup>-09</sup> | 9.49 x10 <sup>-03</sup> |
| Vagina_ENTEX__H3K4me3                                    | 1.58 x10 <sup>-08</sup> | 6.80 x10 <sup>-09</sup> | 0.010                   |
| Spleen__H3K4me3                                          | 1.29 x10 <sup>-08</sup> | 5.58 x10 <sup>-09</sup> | 0.011                   |
| NHDF-<br>Ad_Adult_Dermal_Fibroblast_Primary_Cells__DNase | 9.51 x10 <sup>-09</sup> | 4.16 x10 <sup>-09</sup> | 0.011                   |
| Fetal_Muscle_Trunk__H3K4me1                              | 4.05 x10 <sup>-09</sup> | 1.84 x10 <sup>-09</sup> | 0.014                   |
| Vagina_ENTEX__H3K27ac                                    | 3.87 x10 <sup>-09</sup> | 1.76 x10 <sup>-09</sup> | 0.014                   |
| Fetal_Stomach__H3K27ac                                   | 6.66 x10 <sup>-09</sup> | 3.04 x10 <sup>-09</sup> | 0.014                   |
| Rectal_Smooth_Muscle__H3K27ac                            | 4.24 x10 <sup>-09</sup> | 1.96 x10 <sup>-09</sup> | 0.015                   |
| Aorta__H3K4me3                                           | 2.03 x10 <sup>-08</sup> | 9.66 x10 <sup>-09</sup> | 0.018                   |
| Esoph-Mucosa_ENTEX__H3K36me3                             | 6.09 x10 <sup>-09</sup> | 3.00 x10 <sup>-09</sup> | 0.021                   |
| Foreskin_Fibroblast_Primary_Cells_skin02__H3K4me1        | 4.10 x10 <sup>-09</sup> | 2.04 x10 <sup>-09</sup> | 0.022                   |

Supplementary table 6. GuideRNA sequences targeting rs7090046 in CRISPRi analysis

| Position  | Strand | Sequence                    | PAM | Specificity Score | Efficiency Score  |
|-----------|--------|-----------------------------|-----|-------------------|-------------------|
| 111101236 | 1      | CACCGggcgtagtgtgactgatgtgat | ggg | 76.2198801        | 68.94539763892847 |
| 111101150 | 1      | CACCGtacaattgaggaaacagaa    | agg | 41.2282928        | 65.98685688262587 |
| 111101243 | 1      | CACCGtgactgatgtgatgggtcag   | ggg | 58.2509063        | 65.63862659271983 |
